# Supplementary material for: Genomic Insights into Cyanide Biodegradation in the Pseudomonas Genus
Source: MDPI journal article supplement (doi:10.3390/ijms25084456), 2024-04-18
Supplement: s1 [file s1]

**Table S5.** Results of the pan-genomic analyses performed in this work.

|                          | <i>P. oleovorans</i> | <i>P. fluorescens</i> | <i>P. monteilii</i> | <i>Pseudomonas</i> |
|--------------------------|----------------------|-----------------------|---------------------|--------------------|
| Core                     | 2736 (30.4%)         | 1091 (3.7%)           | 3508 (30.9%)        | 333 (0.3%)         |
| Dispensable clusters     | 4191 (46.5%)         | 11727 (39.5%)         | 4564 (40.2%)        | 40382 (37.7%)      |
| Strain-specific clusters | 2085 (23.1%)         | 16876 (56.8%)         | 3288 (28.9%)        | 66404 (62%)        |
| Total clusters           | 9012                 | 29694                 | 11360               | 107119             |
| Number of genomes        | 18                   | 31                    | 17                  | 143                |
