# Supplementary figures and images for: Genomic Insights into Cyanide Biodegradation in the Pseudomonas Genus
Source: MDPI journal article supplement (doi:10.3390/ijms25084456), 2024-04-18

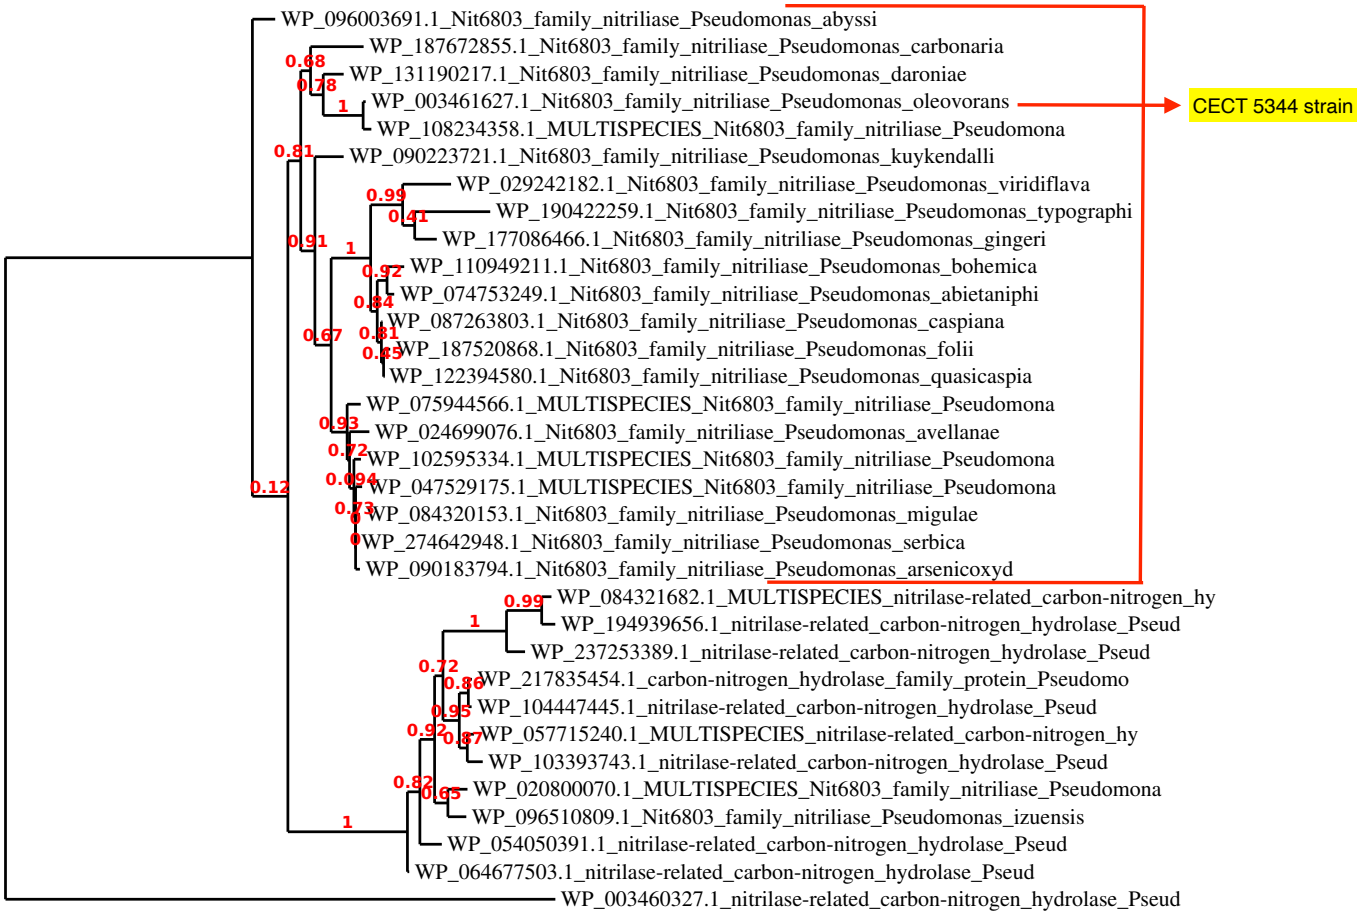

Supplement: s1 [file s1]

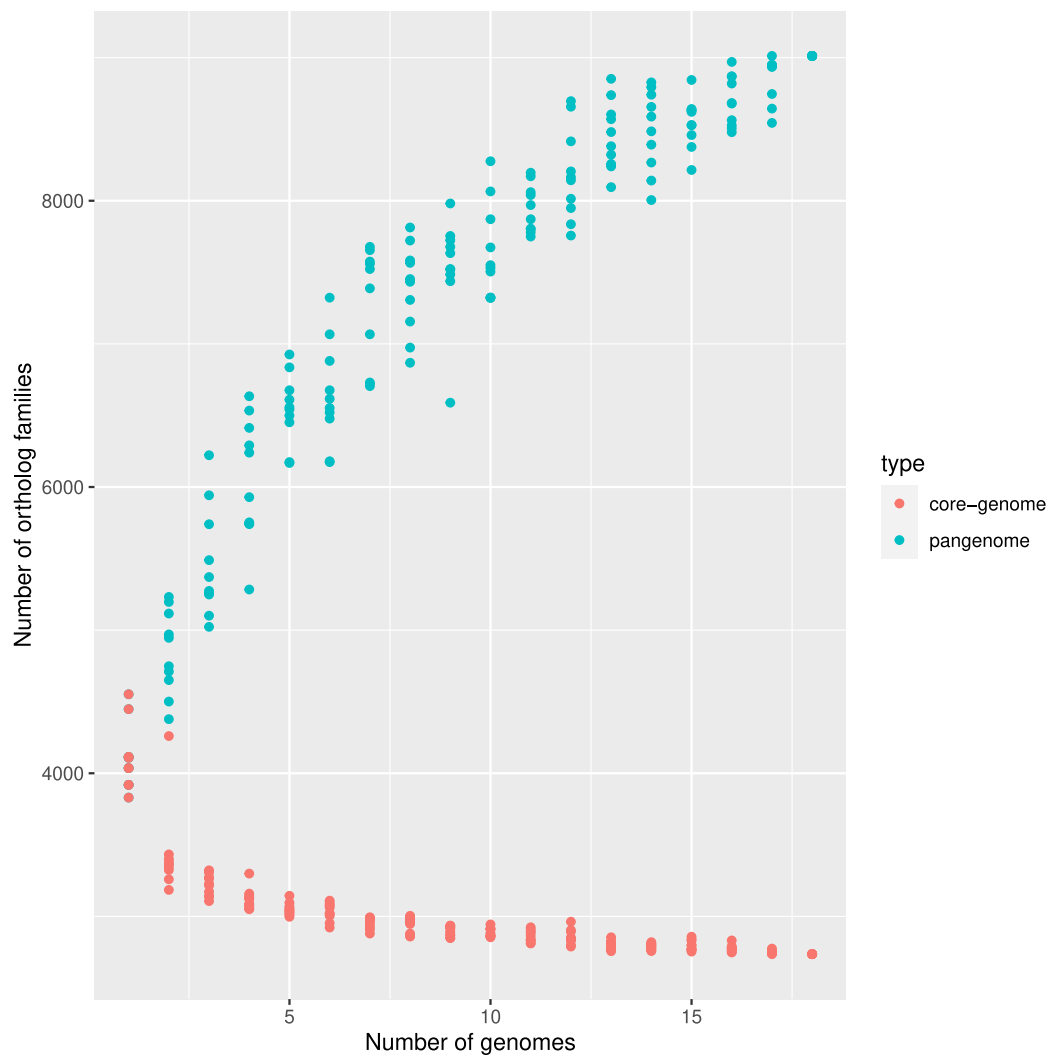

Supplement: s1 [file s1]
